# Supplementary material for: Drone Imaging can Accurately Assess Coral Cover, Bleaching, and Growth Form for Shallow Coral Reefs
Source: Research Square preprint supplement (doi:10.21203/rs.3.rs-8565286/v1), 2026-01-29
Supplement: Supplementary file 1 [file 85e58a4cfd37b530b1931879.docx]

**SUPPLEMENT**:

Supplementary Table 1. Results from pairwise comparisons of coral health categories by depth.

| Health Category | Comparison | Estimate | Standard Error | Z-score | p-value |
| --- | --- | --- | --- | --- | --- |
| Healthy | 5m-crest | 1.51 | 0.261 | 5.796 | <0.001 |
| 10m-crest | 2.19 | 0.267 | 8.208 | <0.001 |
| 15m-crest | 2.45 | 0.270 | 9.090 | <0.001 |
| Pale | 5m-crest | -1.01 | 0.278 | -3.639 | 0.002 |
| 10m-crest | -1.53 | 0.282 | -5.423 | <0.001 |
| 15m-crest | -1.96 | 0.285 | -6.873 | <0.001 |
| Bleached | 5m-crest | -0.757 | 0.292 | -2.593 | 0.047 |
| 10m-crest | -1.09 | 0.294 | -3.716 | 0.001 |
| 15m-crest | -0.930 | 0.293 | -3.179 | 0.008 |

Supplementary Table 2. Results of pairwise comparisons of coral health categories by reef type.

| Health Category | Comparison | Estimate | Standard Error | Z-score | p-value |
| --- | --- | --- | --- | --- | --- |
| Healthy | Fringing - Nearshore | 0.867 | 0.249 | 3.479 | 0.002 |
| Fringing - Midshelf | 0.243 | 0.284 | 0.855 | 0.669 |
| Nearshore - Midshelf | -0.625 | 0.185 | -3.385 | 0.002 |
| Pale | Fringing - Nearshore | -0.857 | 0.258 | -3.315 | 0.003 |
| Fringing - Midshelf | -0.282 | 0.293 | 0.961 | 0.602 |
| Nearshore - Midshelf | 0.575 | 0.189 | 3.045 | 0.007 |
| Bleached | Fringing - Nearshore | -0.377 | 0.264 | -1.428 | 0.326 |
| Fringing - Midshelf | -0.172 | 0.300 | -0.573 | 0.835 |
| Nearshore - Midshelf | 0.205 | 0.198 | 1.035 | 0.554 |

Supplementary Table 3. Results of joint Wald tests on estimated marginal means from model evaluating variations between depths for each growth form.

| Growth Form | F-value | Chi-Squared | p-value |
| --- | --- | --- | --- |
| Branching | 4.216 | 12.648 | 0.006 |
| Encrusting | 5.512 | 16.536 | <0.001 |
| Foliose | 14.922 | 44.766 | <0.001 |
| Massive | 15.215 | 45.645 | <0.001 |
| Mushroom | 4.356 | 13.068 | 0.005 |
| Pillar | 0.297 | 0.891 | 0.828 |
| Table | 1.124 | 3.372 | 0.338 |

Supplementary Table 4. Results of joint Wald tests on estimated marginal means from model evaluating variations between locations for each growth form.

| Growth Form | F-value | Chi-squared | p-value |
| --- | --- | --- | --- |
| Branching | 26.437 | 52.874 | <0.001 |
| Encrusting | 16.190 | 32.380 | <0.001 |
| Foliose | 2.690 | 5.380 | 0.068 |
| Massive | 8.917 | 17.834 | <0.001 |
| Mushroom | 2.465 | 4.930 | 0.085 |
| Pillar | 0.390 | 0.780 | 0.677 |
| Table | 1.799 | 3.598 | 0.165 |
